# Supplementary material for: PVP-assisted transformation of a metal–organic framework into Co-embedded N-enriched meso/microporous carbon materials as bifunctional electrocatalysts
Source: Royal Society of Chemistry journal article supplement (doi:10.1039/c8cc02646g), 2018-01-01
Supplement: c8cc02646g1.pdf [file c8cc02646g1.pdf]

Electronic Supplementary Information (ESI) for Chem. Comm.

**PVP-assisted Transformation of Metal–Organic Framework into Co-Embedded  
N-Enriched Meso/Microporous Carbon Materials as Bifunctional Electrocatalysts**

Zuozhong Liang,<sup>a</sup> Chaochao Zhang,<sup>a</sup> Haitao Yuan,<sup>a</sup> Wei Zhang,<sup>a</sup> Haoquan Zheng,<sup>\*a</sup>  
and Rui Cao<sup>\*ab</sup>

<sup>a</sup>School of Chemistry and Chemical Engineering, Shaanxi Normal University, Xi'an,  
710119, China.

<sup>b</sup>Department of Chemistry, Renmin University of China, Beijing, 100872, China.

Correspondence Email: [zhenghaoquan@snnu.edu.cn](mailto:zhenghaoquan@snnu.edu.cn); [ruicao@ruc.edu.cn](mailto:ruicao@ruc.edu.cn)

## **1. Experimental section**

### **1.1 Materials**

All chemicals were used as received without any further purification.  $\text{Co}(\text{NO}_3)_2 \cdot 6\text{H}_2\text{O}$  (99.99%) and 2-methylimidazole (%) were purchased from the Energy Chemical. Methanol (AR, 99.5%) was purchased from the Tianjin Fuyu Fine Chemical Co., Ltd. KOH (98%) was purchased from Sinopharm Group Chemical Reagent Co., Ltd.

### **1.2 Preparation of porous Co-NC Materials**

First, 1 mmol  $\text{Co}(\text{NO}_3)_2 \cdot 6\text{H}_2\text{O}$  (0.291 g) and 4 mmol 2-methylimidazole (0.238 g) was separately dissolved in 25 mL methanol and sonicated for 5 mins. Then, 2 mmol PVP k30 (160 mg) were added into the prepared Co solution and stirring for 5 mins. The as-prepared 2-methylimidazole solution was slowly dropped into the above solution under the stirring. The resulting slurry was aging for 24 h. The obtained product was denoted as P-ZIF-67-2. In contrast, the product without adding the PVP, namely ZIF-67, and with adding 4, 6, 8 mmol PVP, namely P-ZIF-67-4, P-ZIF-67-6, and P-ZIF-67-8, were synthesized and calcinated with the same method. Then the as-prepared particles were heated to 800 °C at a rate of 5 °C min<sup>-1</sup> in a tube furnace under N<sub>2</sub> atmosphere for 2 h. The final products were defined as Co-NC, P-Co-NC-2, P-Co-NC-4, P-Co-NC-6, and P-Co-NC-8, respectively.

### **1.3 Characterization**

Powder X-ray diffraction (PXRD) patterns of as-prepared materials were measured with a X-ray diffractometer (Bruker, D8 Advance, Cu K $\alpha$ ,  $\lambda = 1.5406 \text{ \AA}$ , 40 kV/40mA). The morphology of the as-prepared material was observed with scanning electron microscopy (SEM, Hitachi, SU8020) and transmission electron microscopy (TEM, JEOL, JEM-2100). The Brunauer-Emmett-Teller (BET) specific surface area was measured in Micromeritics ASAP 2020. The X-ray photoelectron spectroscopy (XPS) analysis of the prepared materials was performed with a Kratos AXIS ULTRA XPS. Thermogravimetric analysis (TGA) was applied by heating the as-prepared sample at a rate of 10 °C min<sup>-1</sup> with N<sub>2</sub> and air from 20 °C to 1000 °C in a TA Instruments SDT Q600. Elemental analyzer (Vario EL III, Elementar Analysensysteme GmbH) was applied to measure the content of C, H, and N. The Raman spectra were measured with a Raman Spectrometer (inVia Reflex, Renishaw).

### **1.4 Electrochemical measurement**

All the electrochemical measurements of ORR performance were performed at ~ 25 °C with a CHI 760E Electrochemical Analyzer (CH Instruments) and a Pine Modulated

Speed Rotator (Pine Research Instrumentation, Inc.). In particular, we selected the rotating ring-disk electrode (RRDE) as the working electrode, Pt wire as the auxiliary electrode, and saturated Ag/AgCl as the reference electrode. In a typical procedure, 5 mg of catalysts and 10  $\mu$ L of Nafion solution (5 wt%, DuPont) were added into 1 mL of isopropanol/deionized water (DIW) solution ( $V_{\text{isopropanol}} : V_{\text{DIW}} = 450 : 40$ ) and then ultrasonicated for  $\sim 1$  h to prepare a homogeneous slurry. Finally, 20  $\mu$ L of the catalysts was coated onto the RDE electrode using pipette (catalyst loading:  $\sim 0.4$  mg  $\text{cm}^{-2}$ ) and dried naturally to form a homogeneous membrane. For the ORR, the cyclic voltammetry (CV) measurements were carried out in  $\text{O}_2/\text{N}_2$ -saturated 0.1 M KOH solution at  $\sim 25$   $^{\circ}\text{C}$  with a scan rate of 5  $\text{mV s}^{-1}$ . The linear sweep voltammetry (LSV) measurements were performed in  $\text{O}_2$ -saturated 0.1 M KOH solution at different rotating rate from 400 to 1600 rpm.

The kinetic properties of the ORR were carried out with the rotating ring-disk electrode (RRDE) in  $\text{O}_2$ -saturated 0.1 M KOH solution at  $\sim 25$   $^{\circ}\text{C}$  with a scan rate of 5  $\text{mV s}^{-1}$  and the ring-electron potential was held at 1.5 V vs RHE. The diameter of the disk is 5.61 mm (0.247  $\text{cm}^2$ ) and the area of the ring is 0.186  $\text{cm}^2$ . The transfer electron number ( $n$ ) was calculated with the following equation:

$$n = 4 \frac{i_d}{i_d + i_r/N}$$

where  $i_d$  is the disk current,  $i_r$  is the ring current, and  $N$  is the ring current collection efficiency, which was determined to be  $\sim 0.39$  with the LSV measurement in  $\text{K}_3\text{Fe}[\text{CN}]_6$  solution. The peroxide percentage ( $\%\text{H}_2\text{O}_2$ ) can be calculated with the following equation:

$$\%\text{H}_2\text{O}_2 = 200 \frac{i_r/N}{i_d + i_r/N}$$

For the OER testing, the activities of the as-prepared materials were evaluated with a CHI 660E Electrochemical Analyzer (CH Instruments). Cyclic voltammetry (CV) curves of the as-prepared catalysts were measured in 1.0 M KOH solution with a three-electrode system. We selected the glassy carbon (GC) electrode with a diameter of 3 mm (0.07  $\text{cm}^2$ ) as the working electrode, Pt wire as the auxiliary electrode, and saturated Ag/AgCl as the reference electrode. In a typical procedure, 4 mg of catalysts and  $\sim 30$   $\mu$ L of Nafion solution (5 wt%, DuPont) were added into 1 mL of DIW/ethanol solution ( $V_{\text{DIW}} : V_{\text{ethanol}} = 2 : 1$ ) and then ultrasonicated for  $\sim 1$  h to prepare a

homogeneous slurry. Finally, 5  $\mu\text{L}$  of the as-prepared catalysts was coated onto the GC electrode using pipette. The overpotential ( $\eta$ ) was calculated based on the following equation:

$$\eta = E_{\text{Ag/AgCl}} + (0.197 + 0.059 \times \text{pH}) - 1.23.$$

**Table S1.** The electron transfer number ( $n$ ) for the commercial Pt/C and as-prepared catalysts Co-NC, P-Co-NC-4, and P-Co-NC-8 measured in O<sub>2</sub>-saturated 0.1 M KOH solution at a rotation rate of 1600 rpm.

| Catalysts | 0.2 V | 0.3 V | 0.4 V | 0.5 V | 0.6 V | 0.7 V | 0.8 V |
|-----------|-------|-------|-------|-------|-------|-------|-------|
| Pt/C      | 3.95  | 3.97  | 3.97  | 3.97  | 3.98  | 3.98  | 4.00  |
| Co-NC     | 3.55  | 3.60  | 3.64  | 3.68  | 3.75  | 3.84  | 3.82  |
| P-Co-NC-4 | 3.49  | 3.55  | 3.60  | 3.67  | 3.77  | 3.88  | 3.89  |
| P-Co-NC-8 | 3.41  | 3.44  | 3.48  | 3.49  | 3.57  | 3.68  | 3.82  |

**Table S2.** Electrochemical activities of bifunctional oxygen catalysts in this work and other reported works.

| Electrocatalysts                                      | $E$ (OER) at 10 mA cm <sup>-2</sup> |               | $E_{1/2}$ (ORR)<br>in 0.1 M KOH | Reference                                              |
|-------------------------------------------------------|-------------------------------------|---------------|---------------------------------|--------------------------------------------------------|
|                                                       | 1.0 M KOH                           | 0.1 M KOH     |                                 |                                                        |
| <b>P-Co-NC-4</b>                                      | <b>315 mV</b>                       | <b>360 mV</b> | <b>850 mV</b>                   | <b>This work</b>                                       |
| Co <sub>3</sub> O <sub>4</sub> @C-MWCNTs              | 320 mV                              | —             | 810 mV                          | <i>J. Mater. Chem. A</i> ,<br>2015, 3, 17392–<br>17402 |
| Fe <sub>3</sub> C@NCNT/NPC                            | 340 mV                              | —             | 900 mV                          | <i>Catal. Sci. Technol.</i> , 2016, 6,<br>6365–6371    |
| Co-MOF@CNTs                                           | 340 mV                              | —             | 820 mV                          | <i>J. Power Sources</i><br>326 (2016) 50-59            |
| ZnCoNC-0.1                                            | —                                   | 520 mV        | 840 mV                          | <i>Nano Res.</i> 2018,<br>11(1): 163–173               |
| Co/NC                                                 | —                                   | 460 mV        | 830 mV                          | <i>Angew. Chem. Int. Ed.</i> 2016, 55,<br>4087–4091    |
| Co@Co <sub>3</sub> O <sub>4</sub> /NC-2               | —                                   | 435 mV        | 810 mV                          | <i>Appl. Surf. Sci.</i> 427<br>(2018) 319–327          |
| Co@N-C                                                | —                                   | 350 mV        | 817 mV                          | <i>Adv. Mater.</i> 2018,<br>1705431                    |
| Co@Co <sub>3</sub> O <sub>4</sub> /NC                 | —                                   | 420 mV        | 800 mV                          | <i>Angew. Chem. Int. Ed.</i> 2016, 55,<br>4087–4091    |
| Co <sub>3</sub> O <sub>4</sub> @Co/NCNT               | —                                   | 380 mV        | 860 mV                          | <i>Chem. Eur. J.</i><br>2017, 23, 18049–<br>18056      |
| Ni <sub>x</sub> Co <sub>y</sub> O <sub>4</sub> /Co-NG | —                                   | 399 mV        | 804 mV                          | <i>J. Mater. Chem. A</i> ,<br>2017, 5, 5594–<br>5600   |

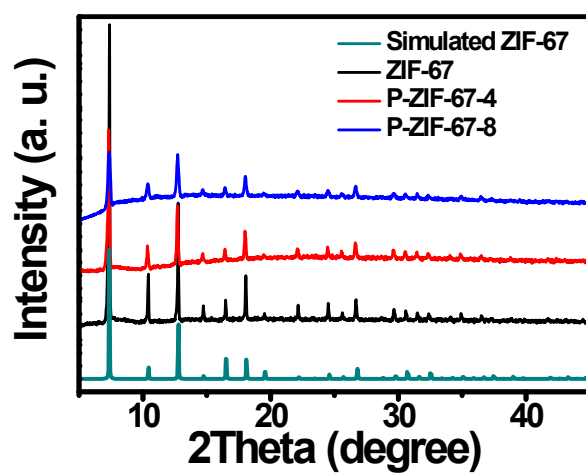

**Fig. S1.** XRD patterns of simulated ZIF-67, ZIF-67, P-ZIF-67-4, and P-ZIF-67-8.

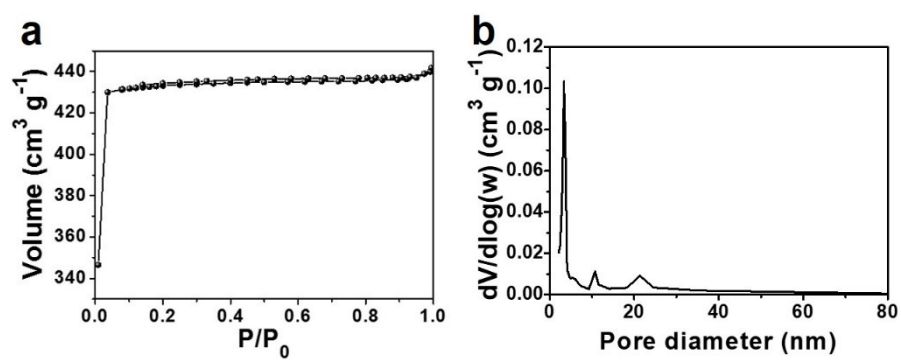

**Fig. S2.**  $N_2$  adsorption-desorption isotherms (a) and pore size distribution (b) for the as-prepared P-ZIF-67-8.

The BET surface area of the as-prepared P-ZIF-67-8 is 1351.49  $m^2/g$ .



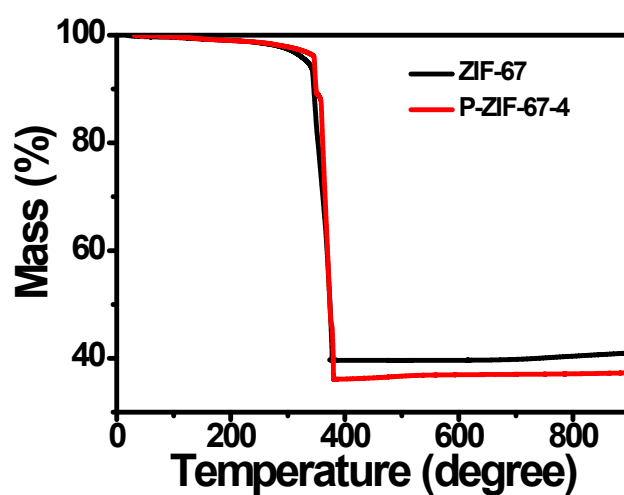

**Fig. S3.** Thermogravimetric analysis (TGA) curves of ZIF-67 (black) and P-ZIF-67-4 (red) measured in air.

The encapsulation of PVP in the P-ZIF-67-4 leads to the lower mass after pyrolysis in air. This is because PVP decomposes with a low carbonization yield of 4% during pyrolysis.

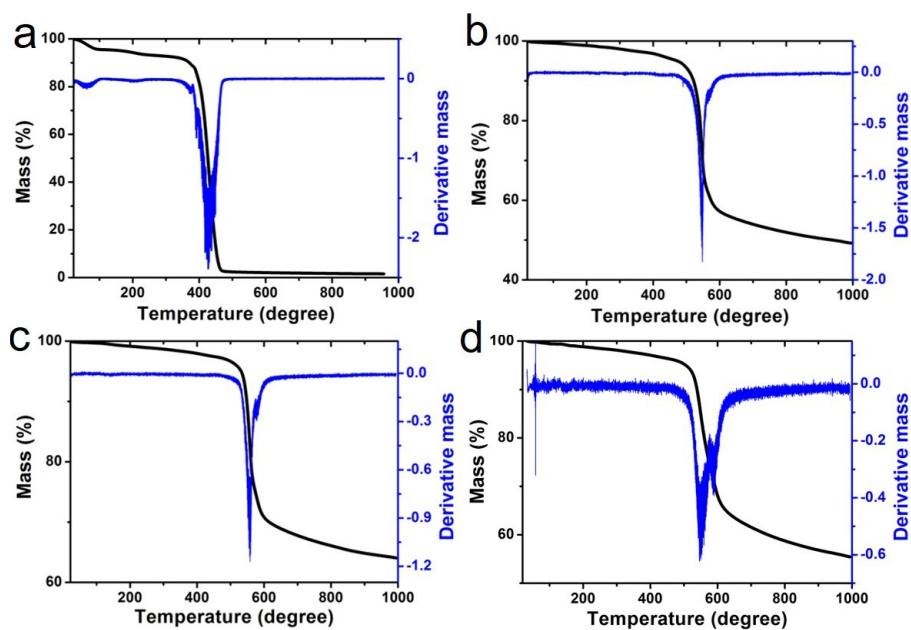

**Fig. S4.** TGA and the corresponding derivative TG curves of PVP (a), ZIF-67 (b), P-ZIF-67-4 (c), and P-ZIF-67-8 (d) measured in N<sub>2</sub>.

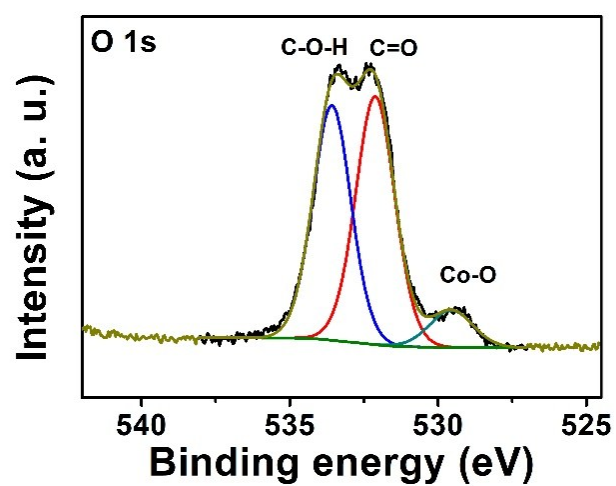

**Fig. S5.** High-resolution XPS spectrum of O 1s for the P-Co-NC-4.

The O1s XPS spectrum of the P-Co-NC-4 can be deconvoluted into the peaks for Co-O (529.6 eV), C=O bonds (532.1 eV) and C-O-H group (533.6 eV).

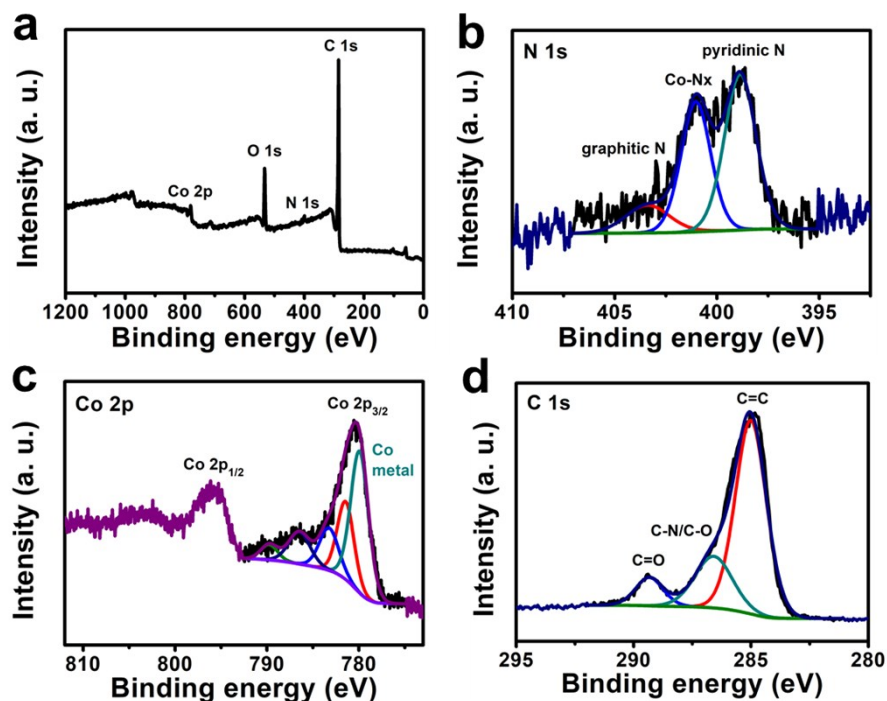

**Fig. S6** XPS survey (a) and high-resolution spectra of N 1s (b), Co 2p (c), and C 1s (d) for the Co-NC.

The XPS spectra of Co-NC prepared without PVP were measured and the results are shown in Fig. S6. It is found that the graphitic N content of high resolution XPS spectrum of N 1s for P-Co-NC-4 (24%) is higher than that in Co-NC (14%), which is consistent with the increased N content of P-Co-NC-4 and the formation of interfacial structure induced by PVP.

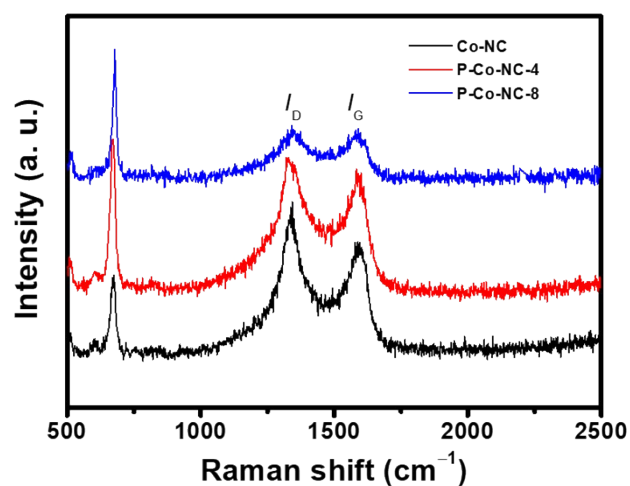

**Fig. S7** Raman spectra of as-prepared Co-NC, P-Co-NC-4, and P-Co-NC-8.

The  $I_D/I_G$  is 1.29, 1.08 and 1.04 for the Co-NC, P-Co-NC-4, and P-Co-NC-8, respectively. There are less C defects in materials with the increasing of PVP, which can be attributed to the formation of the defect-less stable PVP derived carbon//ZIF-67 interfacial structure in P-Co-NC-4 and P-Co-NC-8.

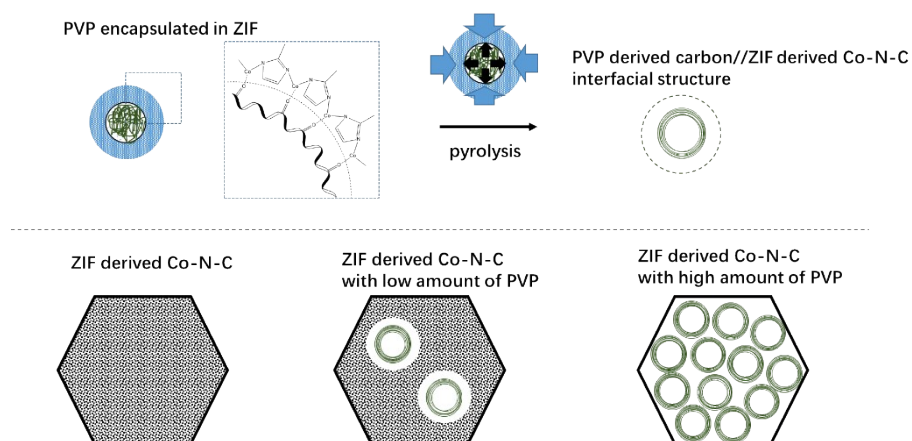

**Fig. S8.** Scheme illustration of the formation process of a PVP derived carbon//ZIF-67 derived carbon interfacial structure.

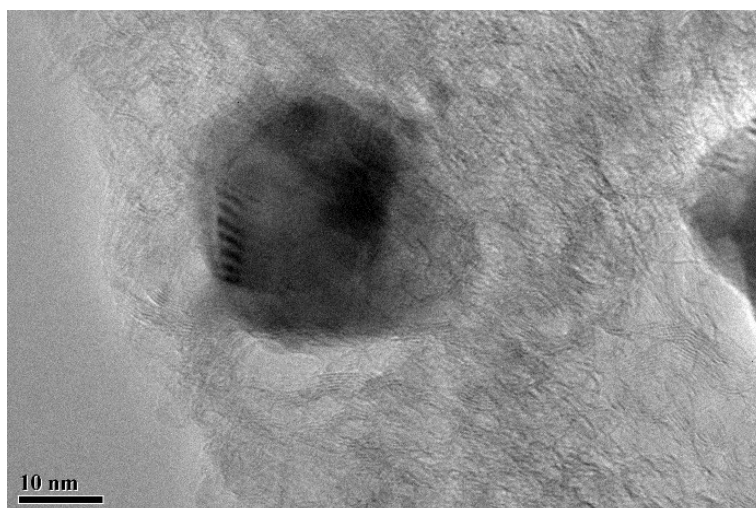

**Fig. S9.** HRTEM image of the as-prepared P-Co-NC-8.

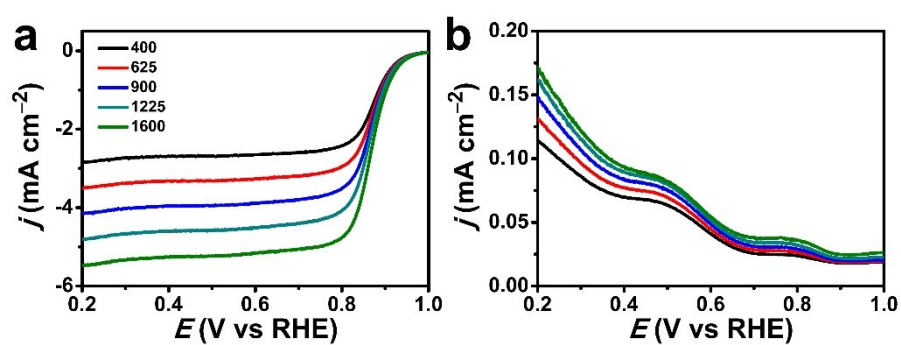

**Fig. S10.** RRDE measurements of LSV curves for the Pt/C after pyrolysis with different rotation rates in O<sub>2</sub>-saturated 0.1 M KOH solution at a scan rate of 10 mV s<sup>-1</sup> (a: the current density for the disk; b: the current density for the ring).



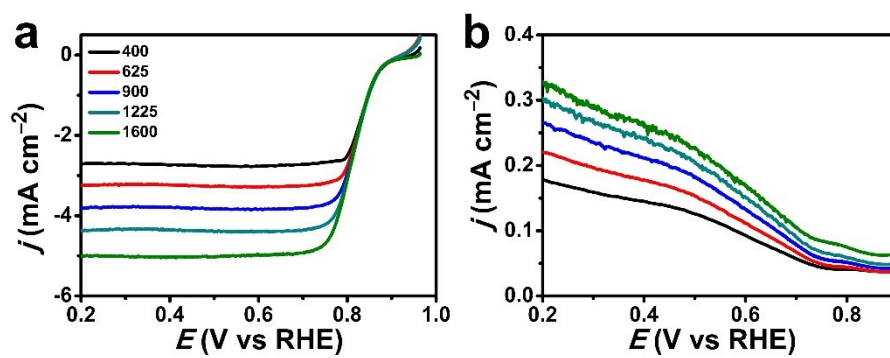

**Fig. S11.** RRDE measurements of LSV curves for the Co-NC with different rotation rates in O<sub>2</sub>-saturated 0.1 M KOH solution at a scan rate of 10 mV s<sup>-1</sup> (a: the current density for the disk; b: the current density for the ring).

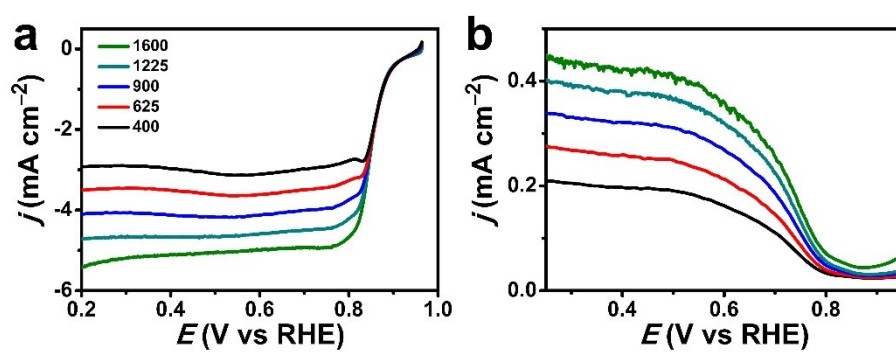

**Fig. S12.** RRDE measurements of LSV curves for the P-Co-NC-4 with different rotation rates in  $O_2$ -saturated 0.1 M KOH solution at a scan rate of  $10 \text{ mV s}^{-1}$  (a: the current density for the disk; b: the current density for the ring).

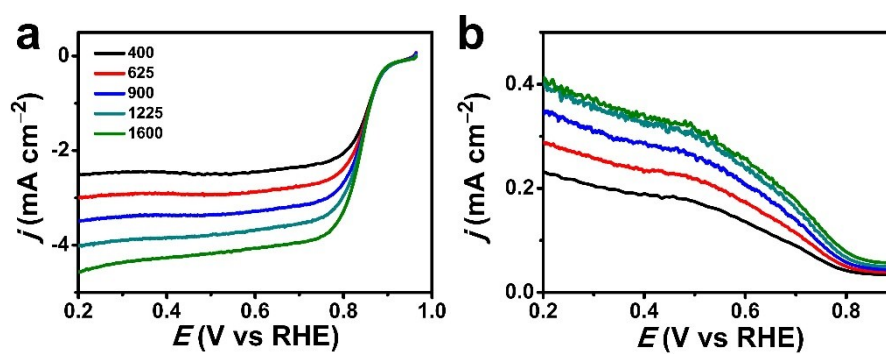

**Fig. S13.** RRDE measurements of LSV curves for the P-Co-NC-8 with different rotation rates in O<sub>2</sub>-saturated 0.1 M KOH solution at a scan rate of 10 mV s<sup>-1</sup> (a: the current density for the disk; b: the current density for the ring).

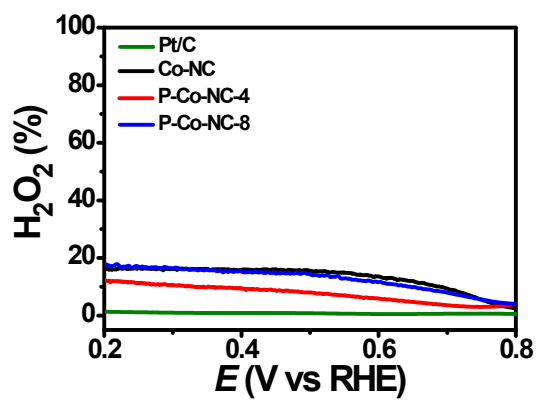

**Fig. S14.** H<sub>2</sub>O<sub>2</sub> yield of Pt/C, Co-NC, P-Co-NC-4, and P-Co-NC-8 at various potentials based on RRDE data.

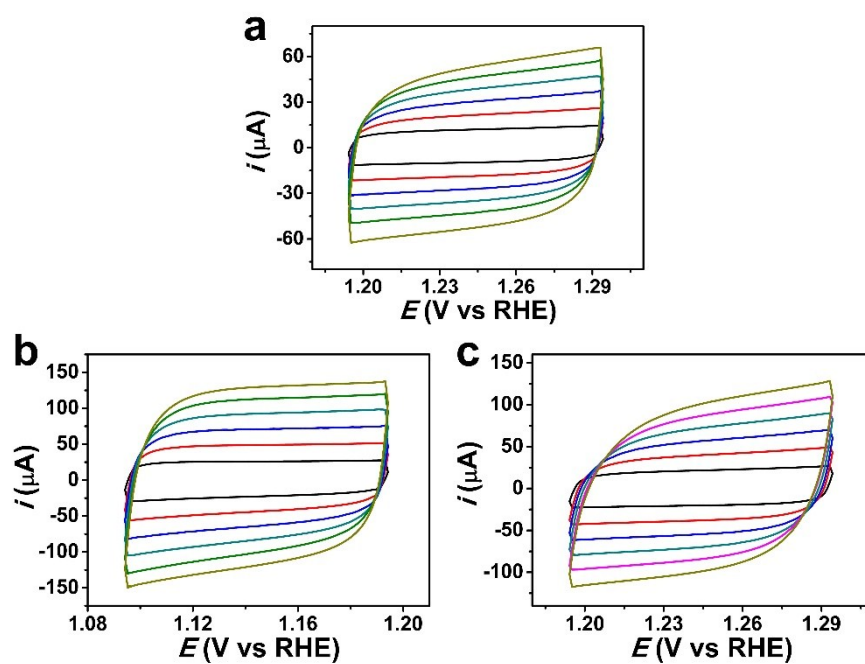

**Fig. S15.** CVs of Co-NC (a), P-Co-NC-4 (b) and P-Co-NC-8 (c) at scan rates of 20, 40, 60, 80, 100, and 120  $\text{mV s}^{-1}$ .
